# Supplementary material
Source: PubMed Central journal article supplement (PMC3775921)

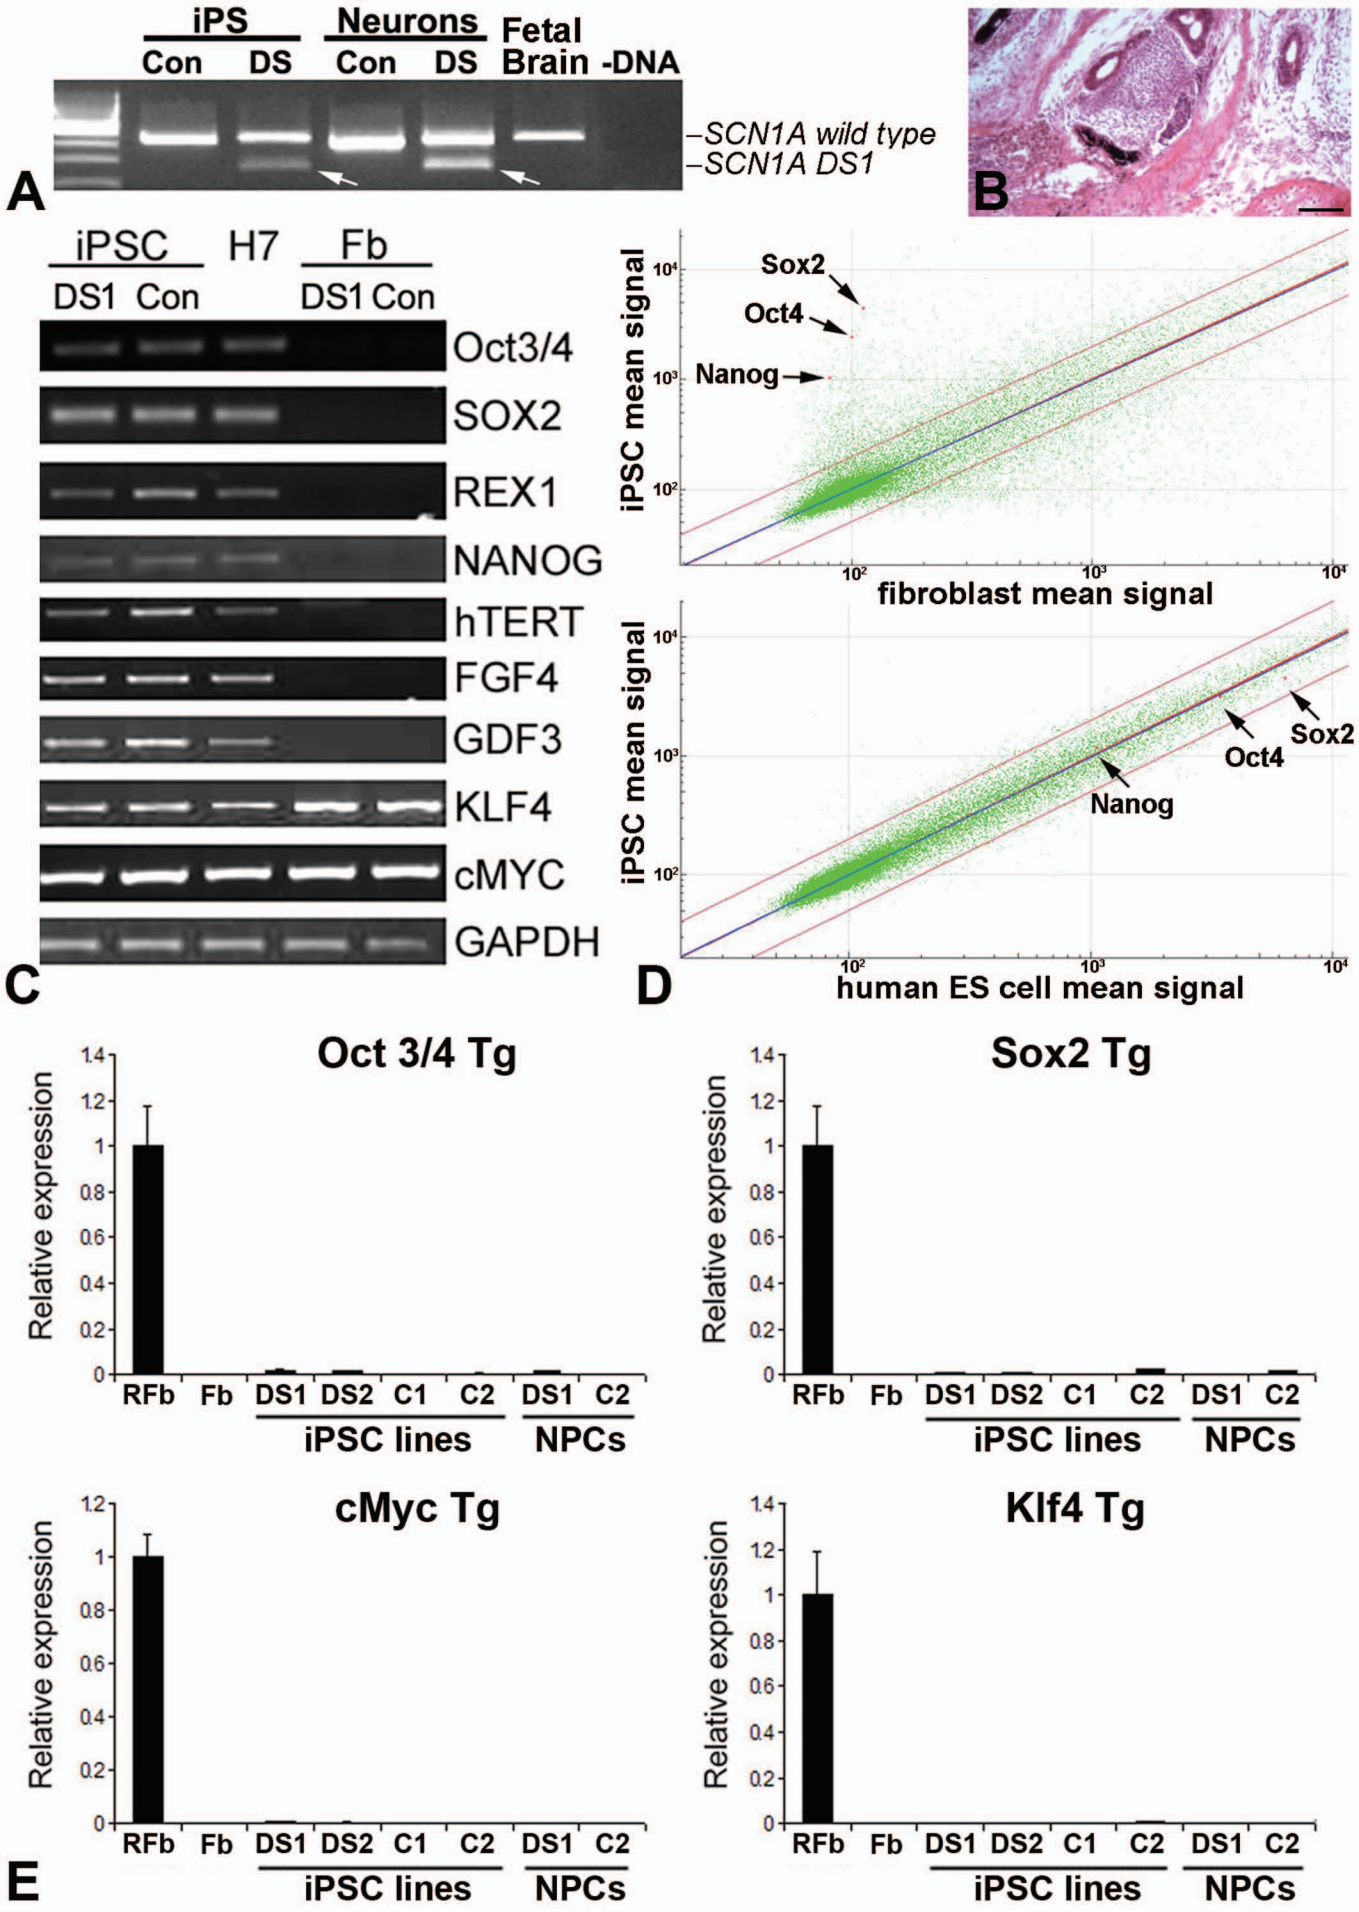

**DS1 Con**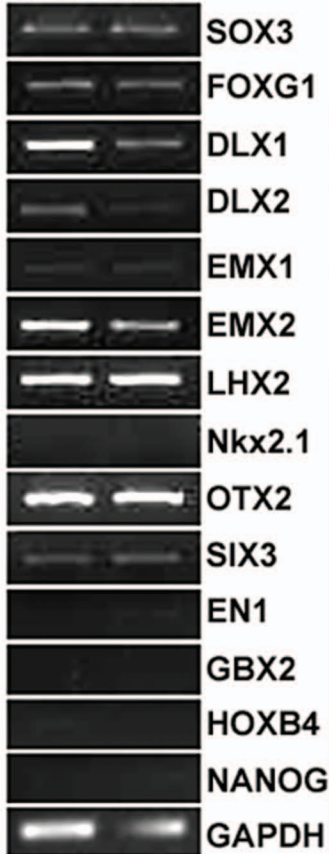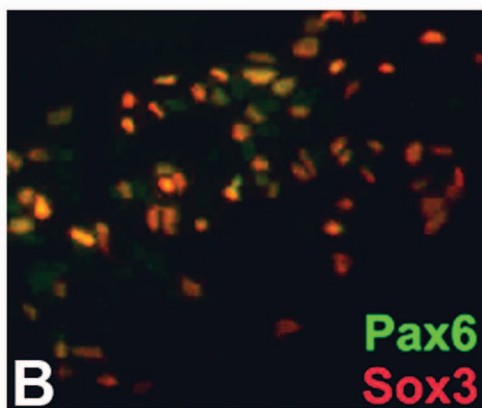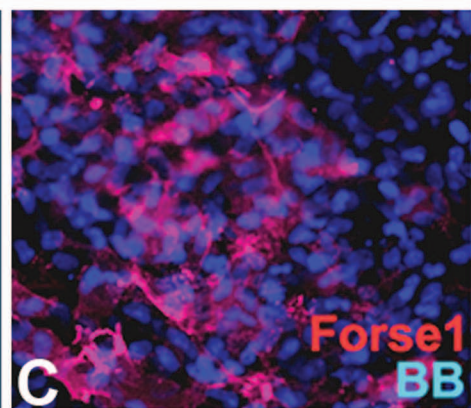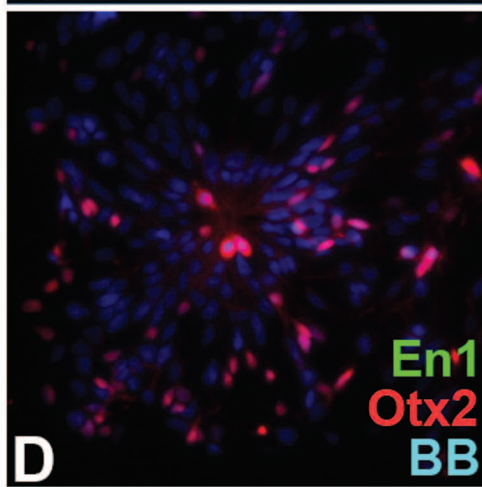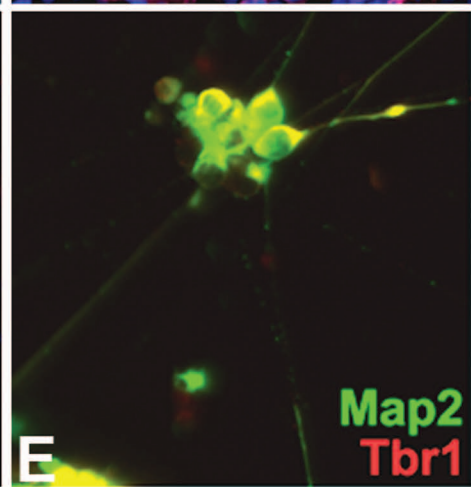**A****B****C****D****E**

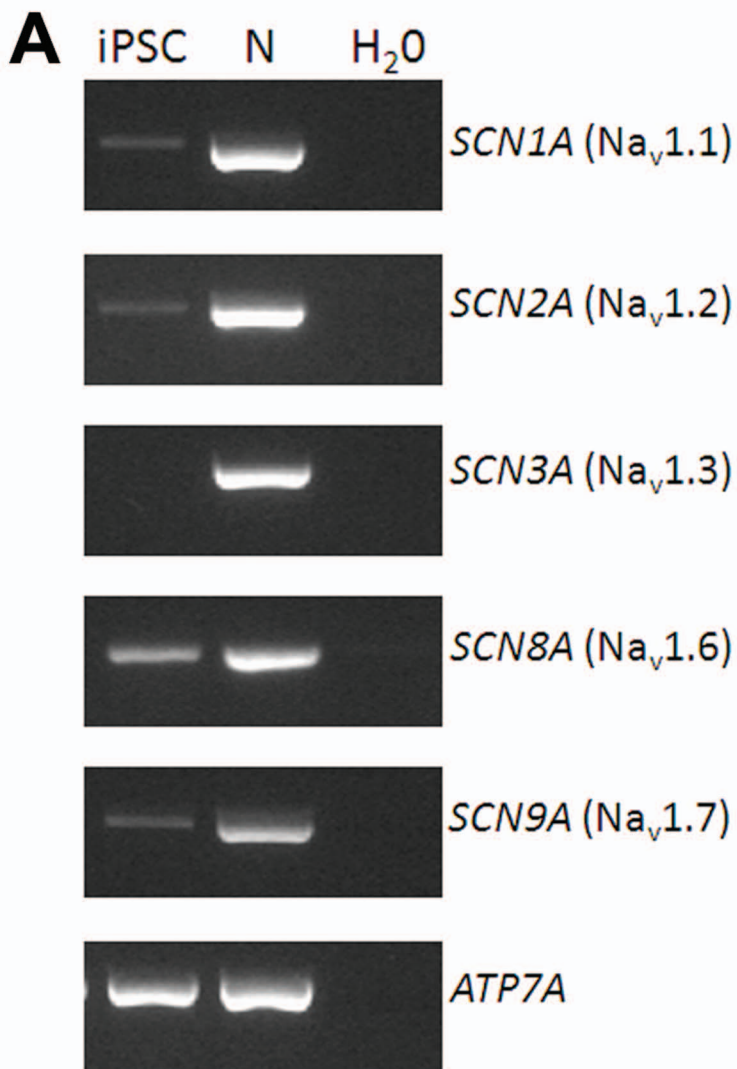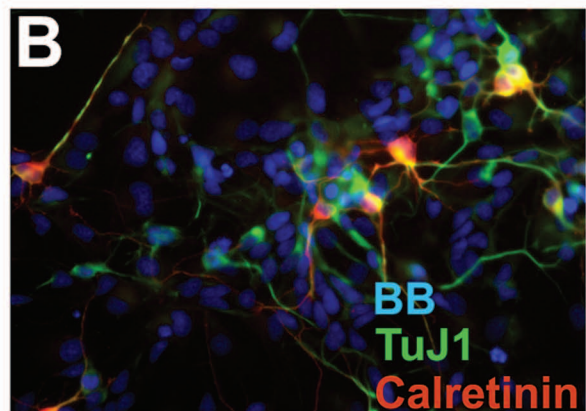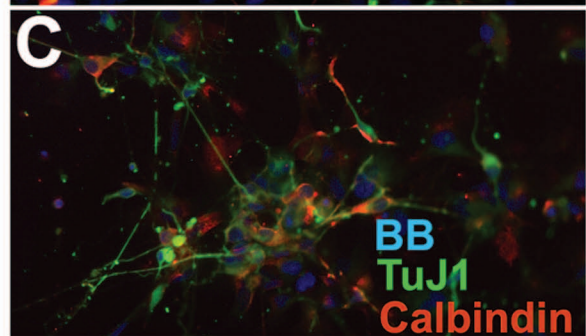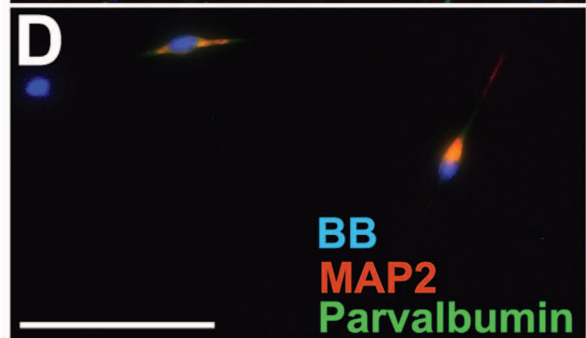

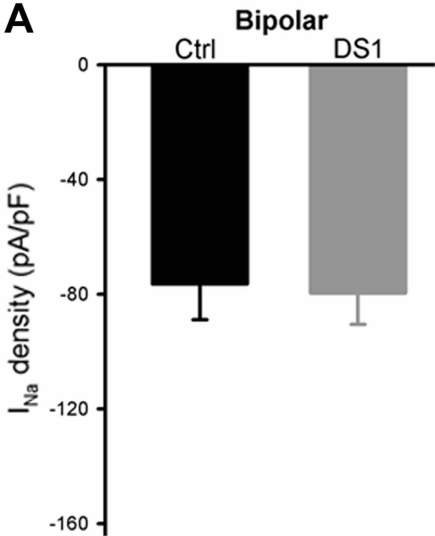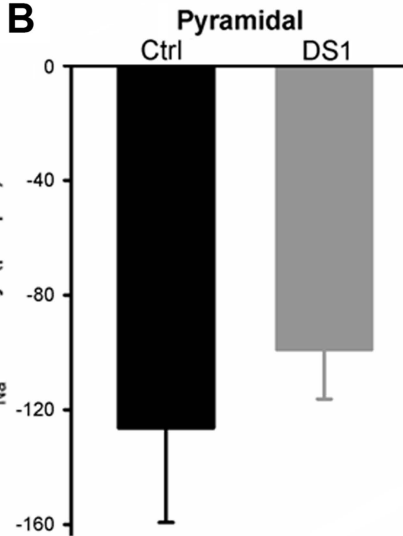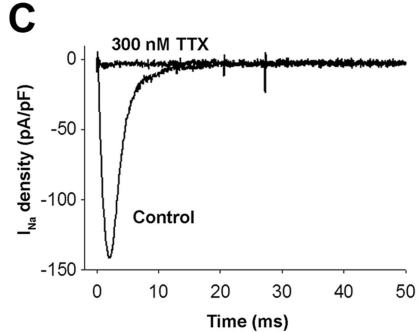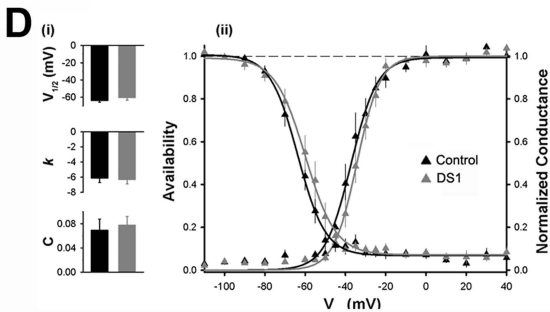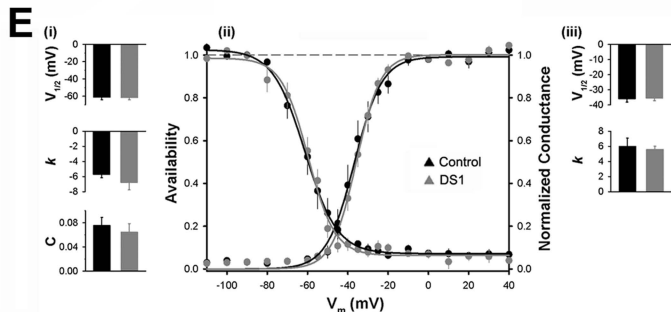

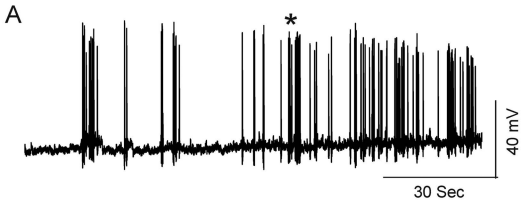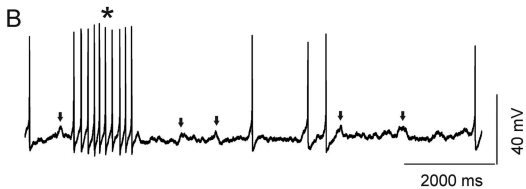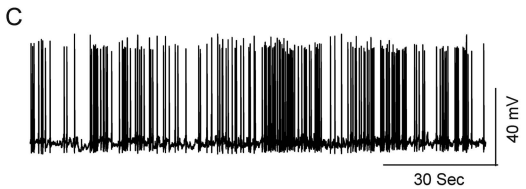

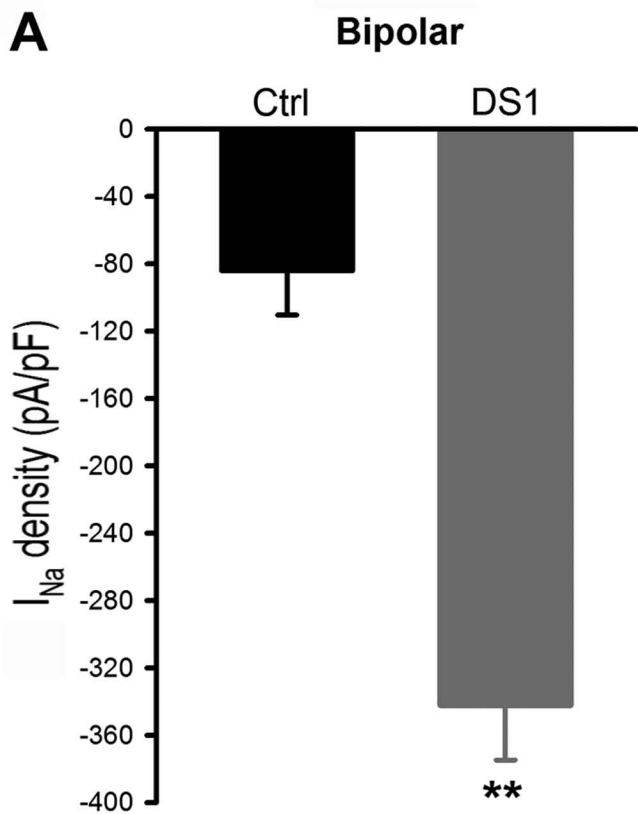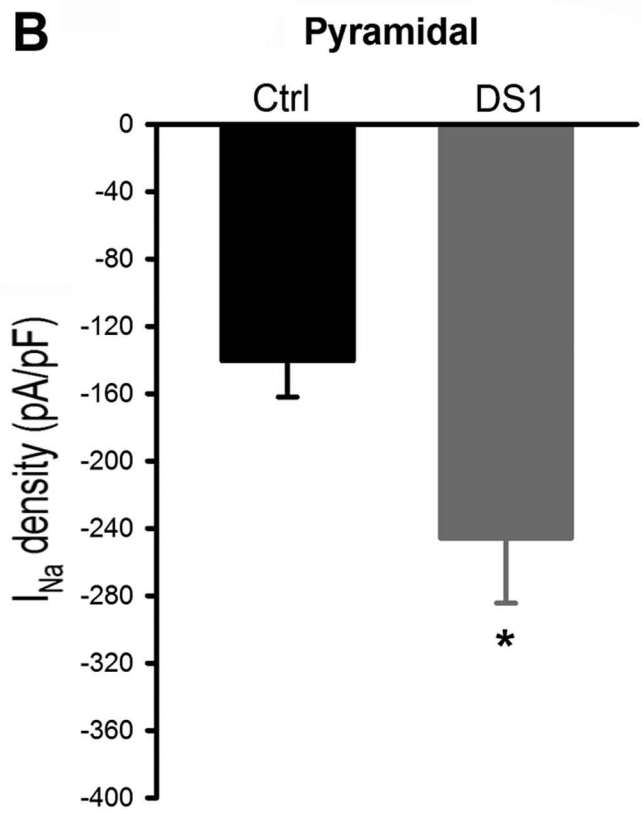

Supplement: NIHMS460765-supplement-Supp_Fig_S1-S6.pdf [file NIHMS460765-supplement-Supp_Fig_S1-S6.pdf]
